# Supplementary material for: Establishment of a high-fidelity patient-derived xenograft model for cervical cancer enables the evaluation of patient’s response to conventional and novel therapies
Source: J Transl Med. 2023 Sep 9;21:611. doi: 10.1186/s12967-023-04444-5 (PMC10492358; doi:10.1186/s12967-023-04444-5)
Supplement: Supplementary file 1 — Additional file 1: Fig. S1 Histological characteristics of primary tumors and paired PDX models. a. The histological features of cervical cancer primary tumors and corresponding PDX tumors were assessed by hematoxylin and eosin staining in three patients. b. Quantitation of the epithelial and stromal components of the tumor and corresponding PDXs. Fig. S2 Genomic characteristics of primary tumor and paired PDX models. a. Whole-exome sequencing-based estimates of the purity and tumor ploidy of 10 paired samples. b. The percentage of the SNP genome discordance between PT and P1, or between P1and P2. c. AID/APOBEC mutational signatures (signatures 2 and 13) in PDXs. Fig. S3 Gating strategy of immune cell subsets in the tissues of primary tumors a. Gating strategy used for the analysis of leukocyte and T-cell subpopulations. b. The proportions of Treg and Trm in the engrafter and non-engrafter groups. c and d. The proportions of TEMRA, TEM, TCM, TN, and PD-1 positive fraction in CD4+ and CD8+ T cells in the engrafter (n = 6) and non-engrafter (n = 4) groups. These data are represented as the mean ± standard error. Statistical analyses were performed using the Mann–Whitney U test. Fig. S4 Tumor immune microenvironment of rapid engrafters and slow and non-engrafters. a. The proportions of T, B, and natural killer cells, monocytes, and T-cell subpopulations. (Rapid engrafters [n = 6] and slow and non-engrafters [n = 13]). b. The proportions of TEMRA, TEM, TCM, TN, and PD-1 positive fraction in CD4+ and CD8+ T cells in rapid-engrafters (n = 4) and slow- and non-engrafters (n = 6) groups. c. The proportions of immune cell subsets in the tumor according to the Cell-type Identification by Estimating Relative Subsets of RNA Transcripts. Rapid engrafters (n = 10), slow and non-engrafters (n = 16). These data are represented as the mean ± standard error. Statistical analyses were performed using the Mann–Whitney U test. Fig. S5 Transcriptome profiles of rapid and slow and non-eng [file 12967_2023_4444_MOESM1_ESM.zip › New folder/table S1.xlsx]

## Sheet: Sheet1
Table S1. Primary antibodies used in this study.
Primary antibodies	Source	Catalog no.
Anti-human CD45 APC-H7 (2D1)	BD	560178
Anti-human CD3 APC-Cy7 (SK7)	BD	90588667
Anti-human CD4 PE (RPA-T4)	BD	7069662
Anti-human CD8 BV605 (RPA-T8)	BD	8187647
Anti-human CCR7 PE-Cy7 (3D12)	BD	9050726
Anti-human CD279 BV421 (EH12.1)	BD	163117
Anti-human CD103 APC (BEr-ACT8)	BD	8345924
Anti-human CD69 BV605 (FN50)	BD	8110765
Anti-human CD45RA APC (HI100)	BD	169553
Anti-human TNF-a PE (MAb11)	BD	7094907
Anti-human GZME PE (GB11)	BD	7160588
Anti-human IFN-γ BV421 (4SB3)	BD	9177405
Anti-human IGF2R APC (QA19A18)	Biolegend	364205
Rabbit monoclonal anti-CD4 (SP8)	MXB
Rabbit monoclonal anti-CD8 (SP16)	MXB
Rabbit monoclonal anti-CDKN2A (EPR1473)	Abcam	ab108349
Mouse monoclonal anti-Ki67 (MIB1)	DAKO	M724001
Rabbit monoclonal anti-α-SMA	Abcam	ab5694
Anti-human CD3 antibody (OKT3)	Biolegend	317326
