# Supplementary figures and images for: Establishment of a high-fidelity patient-derived xenograft model for cervical cancer enables the evaluation of patient’s response to conventional and novel therapies
Source: Springer Nature journal article supplement (doi:10.1186/s12967-023-04444-5), 2023-09-09

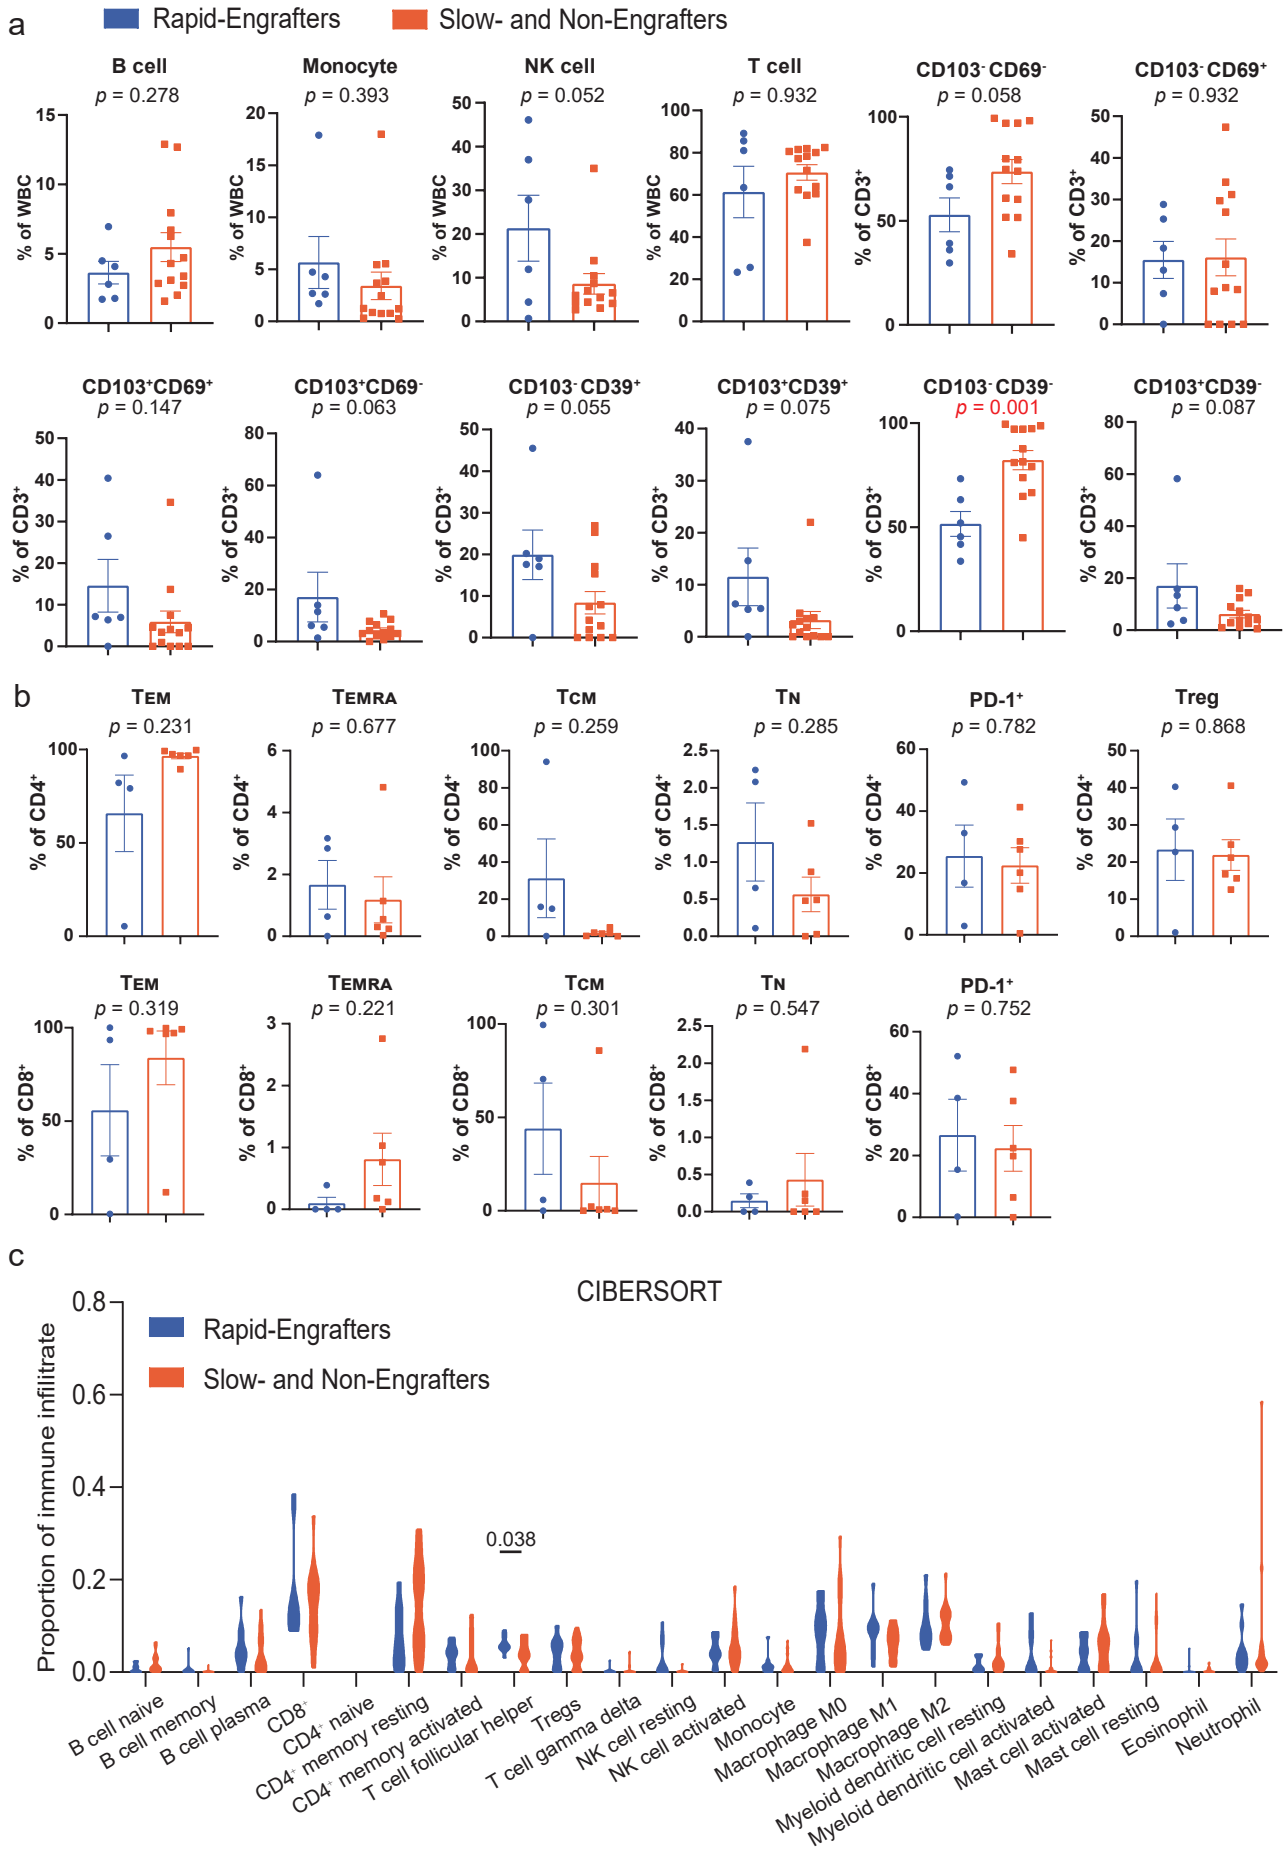

Supplement: MOESM1 [file 26024372]

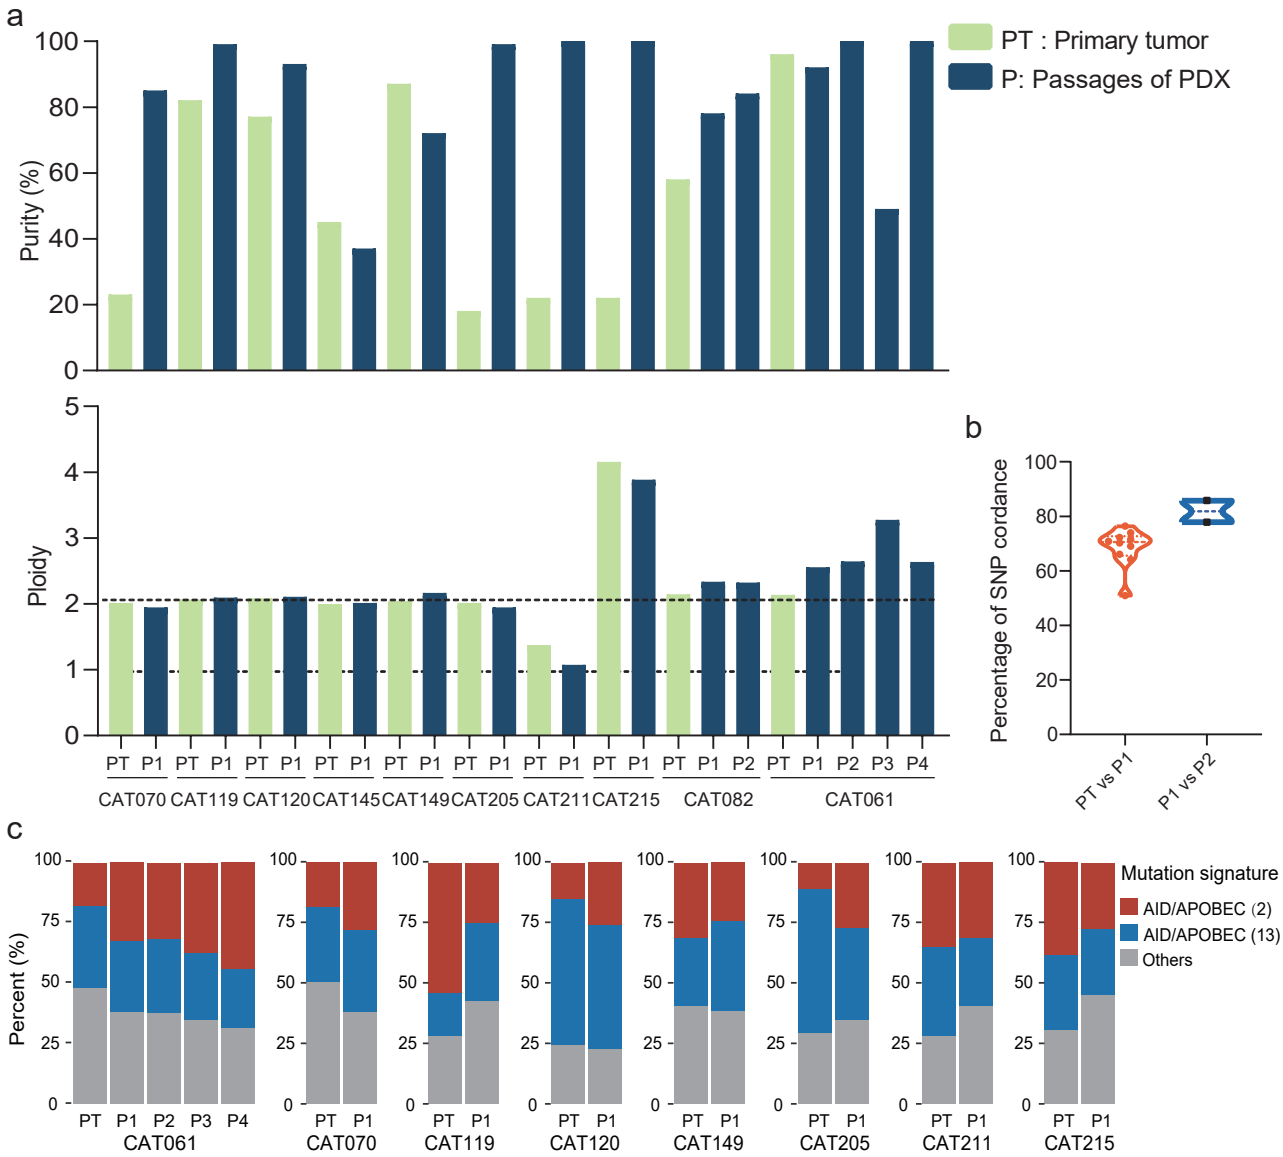

Supplement: MOESM1 [file 26024372]

**a**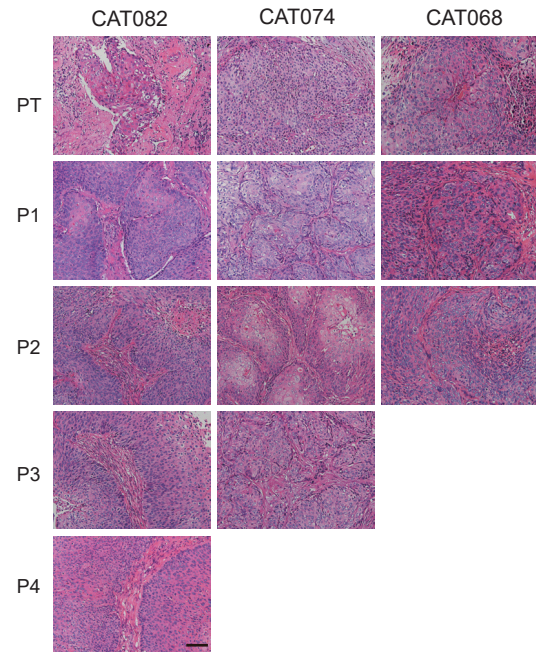**b**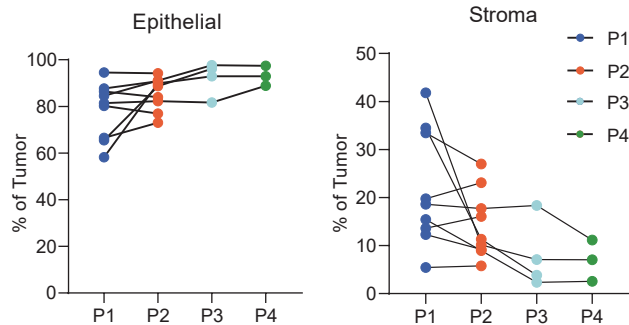

Supplement: MOESM1 [file 26024372]

a

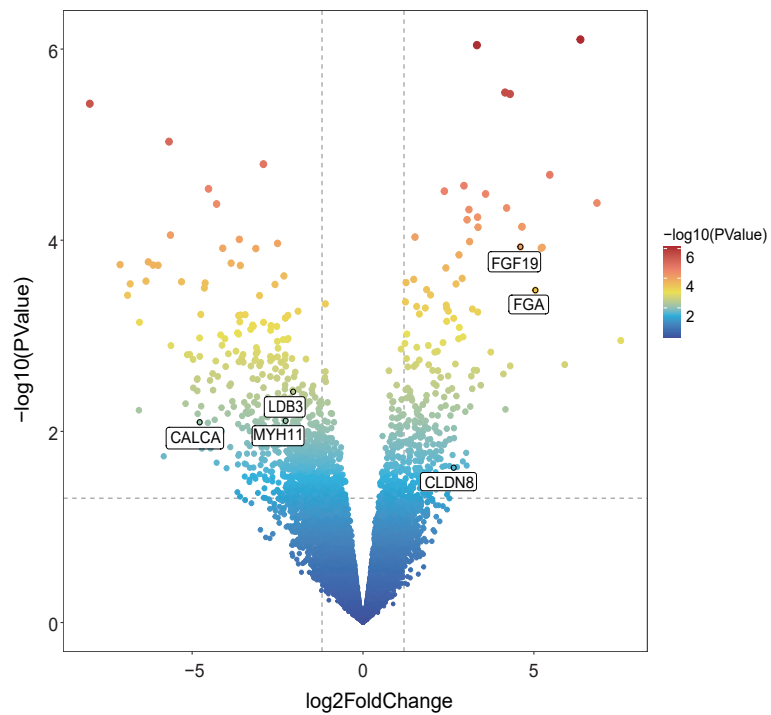

b

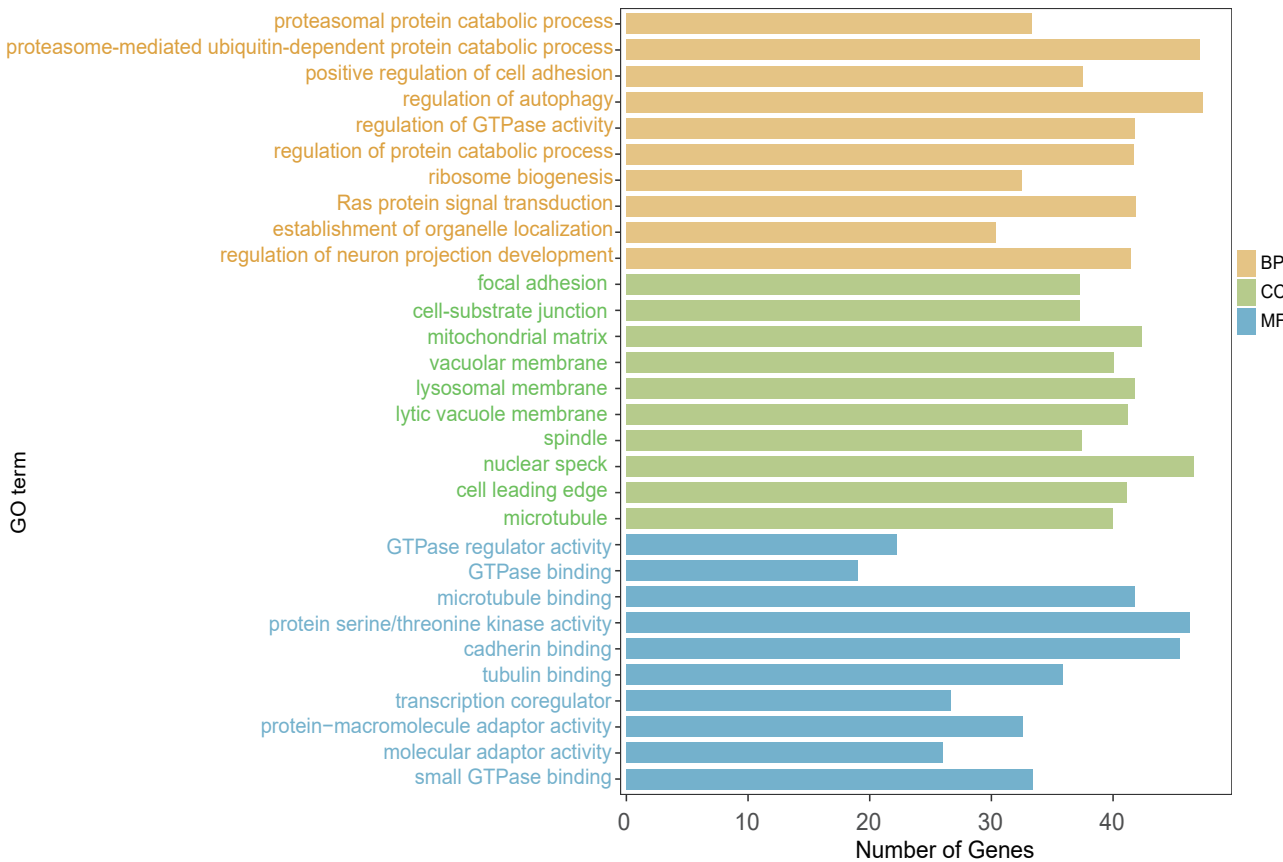

Supplement: MOESM1 [file 26024372]

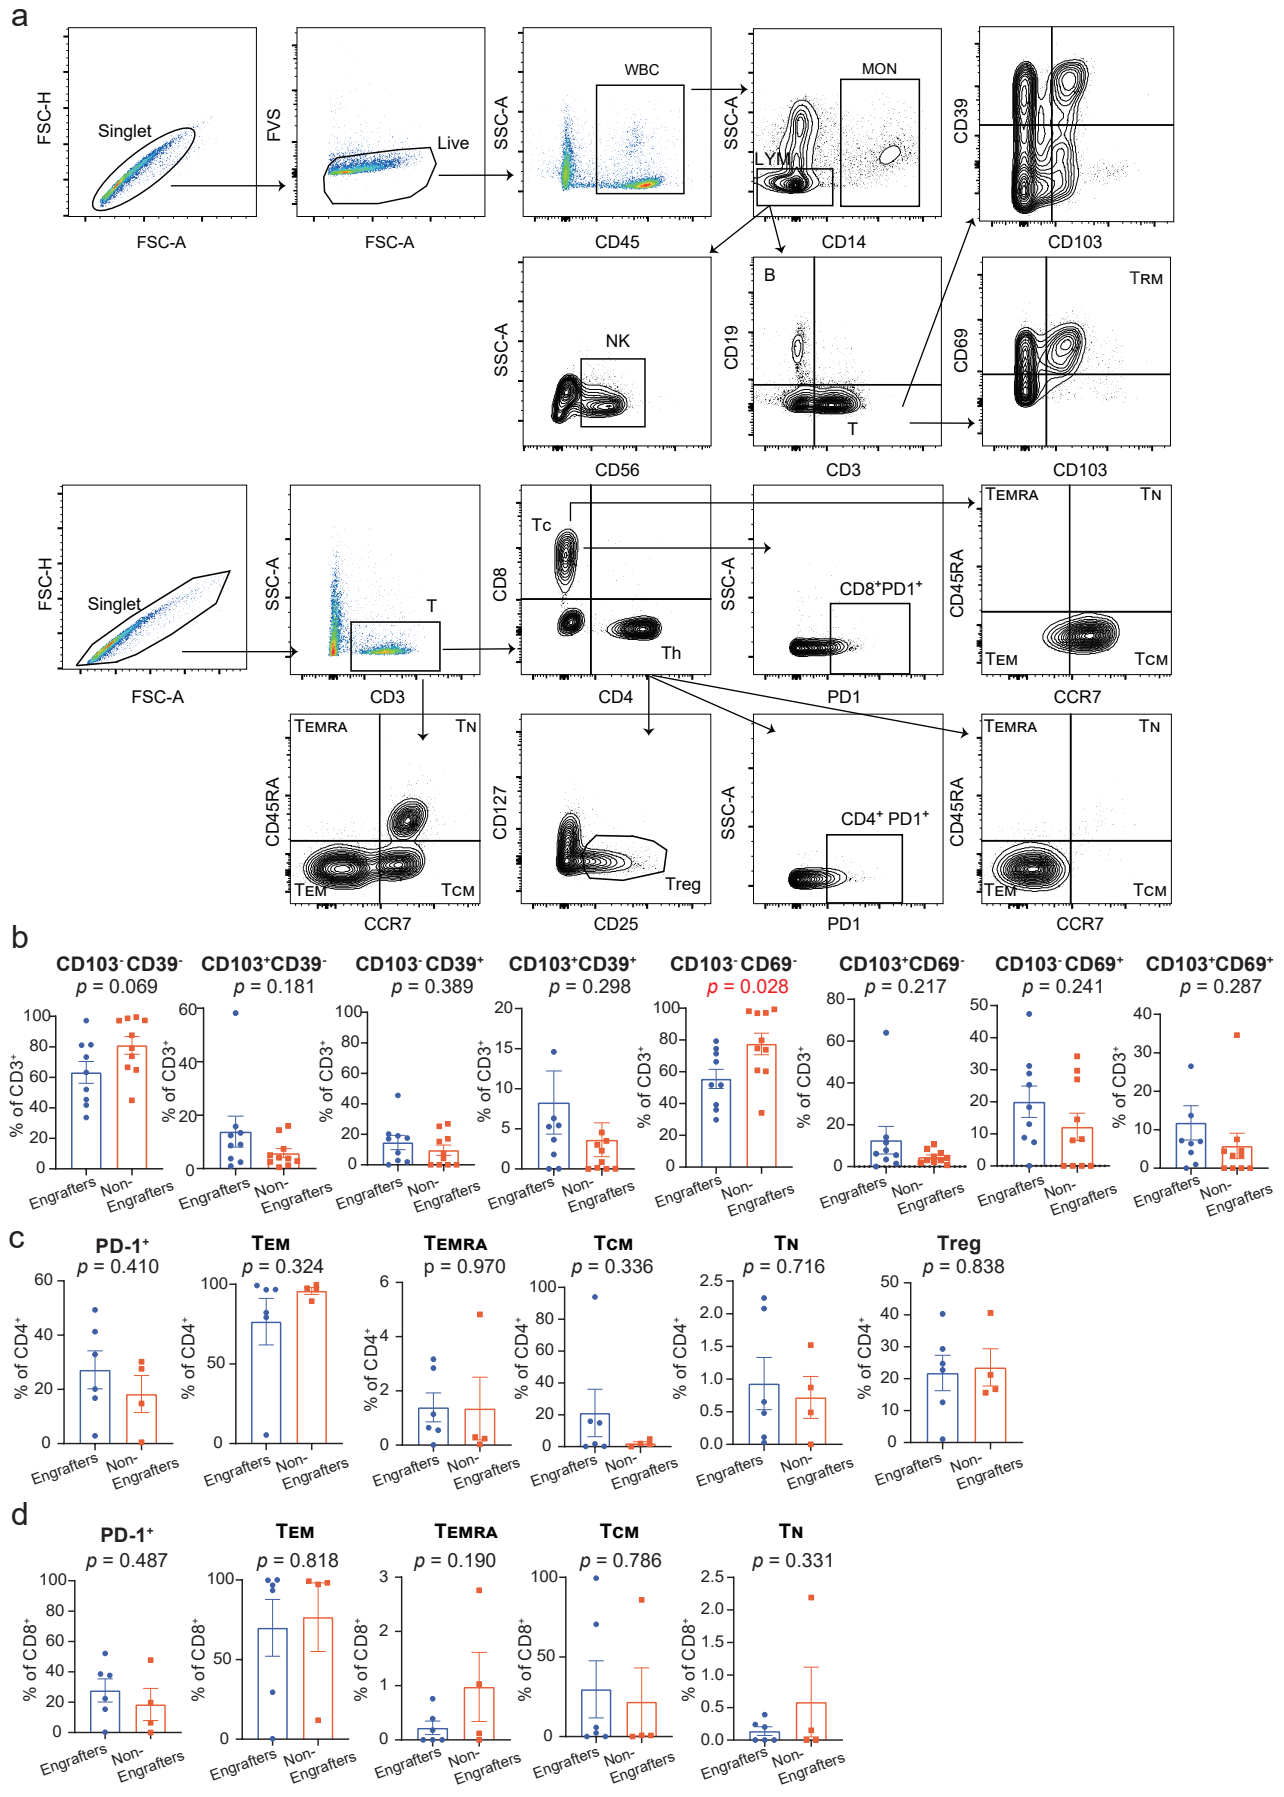

Supplement: MOESM1 [file 26024372]

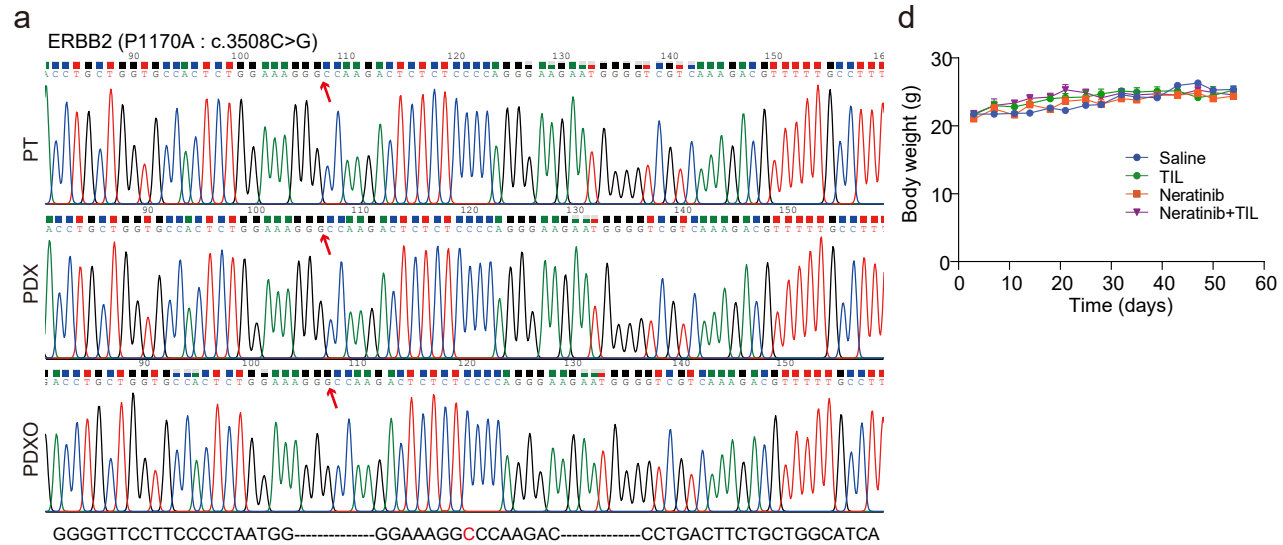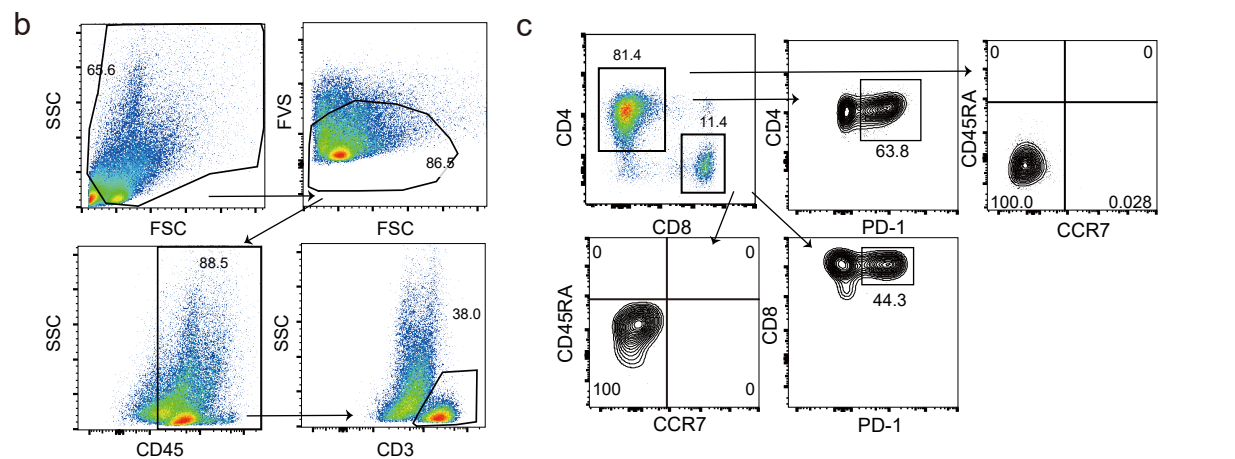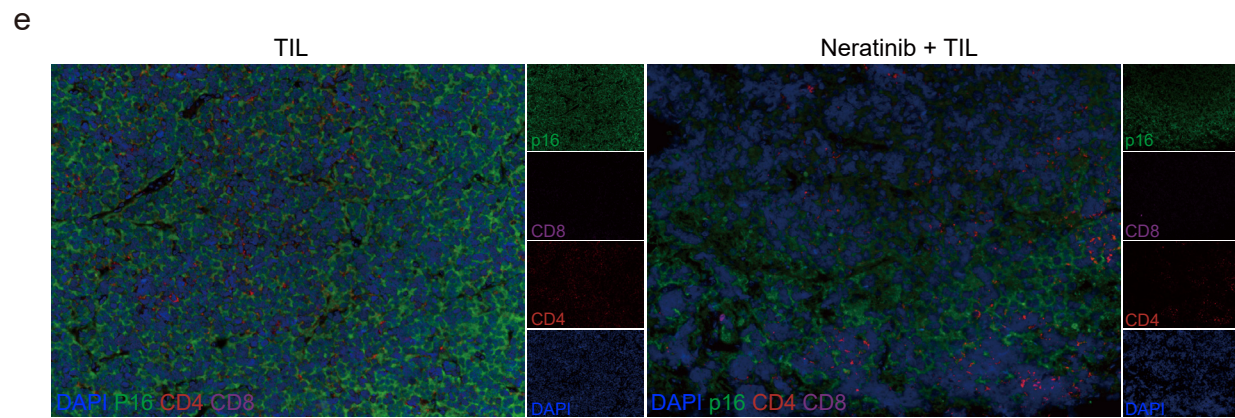

Supplement: MOESM1 [file 26024372]
